# Supplementary material
Source: PubMed Central journal article supplement (PMC2262965)
Supplement: mbc_E07-06-0556_1.pdf [file mbc_E07-06-0556_1.pdf]

**Supplementary Figure legends**

**Supplementary Figure S1. Generation of knockout (KO) cell lines of CENP-O-class proteins.**

- (A) (a) Restriction maps of the chicken *CENP-Q* locus, gene disruption constructs, and targeted loci. Black boxes indicate the positions of exons. XbaI restriction sites are shown. The position of the probe used for Southern hybridization is indicated. Novel 9.8- and 17.5-kb XbaI fragments hybridize to the probe if targeted integration of the construct occurs. (b) Restriction analysis of genomic DNAs from cells with targeted integration of a *CENP-Q* disruption construct. Genomic DNAs from wild-type (WT) DT40 cells, a clone after first-round targeting (+/-, 1st), and a clone (#102) after second-round targeting (-/-, 2nd KO) were analyzed by Southern hybridization with the probe indicated in (a). M is  $\lambda$ -DNA digested with HindIII. (c) Western blot analysis of KO cell (#102) extracts with anti-CENP-Q antibody. Anti- $\alpha$ -tubulin antibody was used as a loading control.
- (B) (a) Restriction maps of the chicken *CENP-R* locus, gene disruption constructs, and targeted loci. There are three alleles of the *CENP-R* locus. Black boxes indicate the positions of exons. EcoRV restriction sites are shown. The position of the probe used for Southern hybridization is indicated. Novel 14.0-kb EcoRV fragments hybridize to the probe if targeted integration of the construct occurs. (b) Restriction analysis of genomic DNAs from cells with targeted integration of a *CENP-R* disruption construct. Genomic DNAs from WT DT40 cells, a clone after first-round targeting (+/+/-, 1st), a clone after second-round targeting (+/+/-, 2nd), and a clone (#133) after third-round targeting (-/-/-, 3<sup>rd</sup> knockout) were

analyzed by Southern hybridization with the probe indicated in (a). M is  $\lambda$ -DNA digested with HindIII. (c) Western blot analysis of KO cell (#133) extracts with anti-CENP-R antibody. Anti- $\alpha$ -tubulin antibody was used as a loading control.

(C) Creation of CENP-P- and CENP-50-double KO cells. We previously created a tetracycline-repressible conditional KO cell line for CENP-50 (#17-15 cells). We performed two-round targeting with CENP-P disruption constructs into #17-15 cells. Both CENP-P and CENP-50 were not expressed in double KO cells (#4-46, with tetracycline) by Western blot analysis. +tet indicates addition of tetracycline to the culture medium. A Coomassie brilliant blue (CBB) staining gel is also shown.

### **Supplementary Figure S2. Potential phosphorylation sites for chicken CENP-50**

Five potential CDK phosphorylation sites (T99, S112, S145, S148, S151) are selected. Additional phosphorylation sites around the CDK sites are chosen by using the NetPhos 2.0 software (<http://www.cbs.dtu.dk/services/NetPhos/>). Total 16 potential serine/threonine phosphorylation sites, which are shown as red characters were chosen and mutated to alanine (16 $\times$ A mutant). 62S and 63T for PLK1 phosphorylation are indicated by underline.

### **Supplementary Movie legends**

#### **Supplementary Movie1**

Chromosome dynamics in control cells observed by time-lapse microscopy of living cells.

#### **Supplementary Movie2**

Chromosome dynamics in CENP-Q-deficient cells observed by time-lapse  
microscopy of living cells.

A

## (a) Chicken CENP-Q knockout

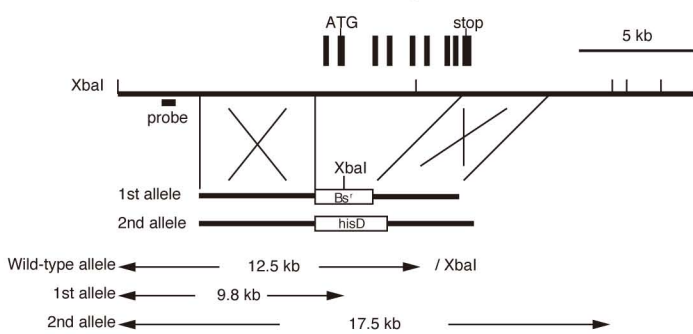

## (b)

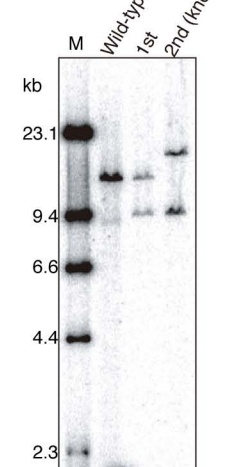

## (c)

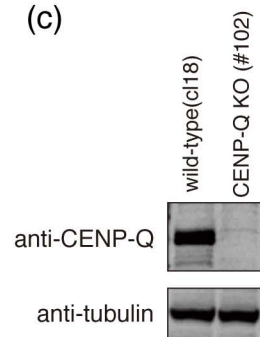

B

## (a) Chicken CENP-R knockout

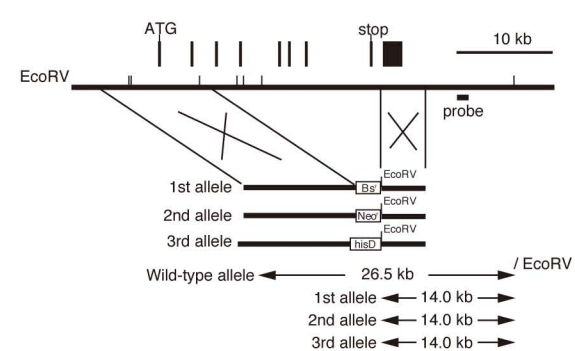

## (b)

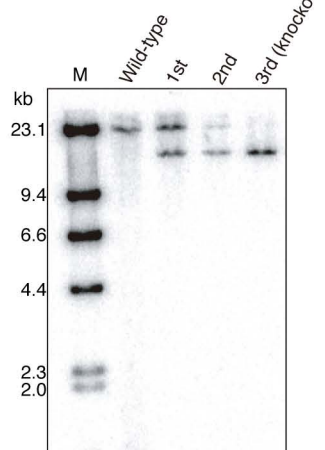

## (c)

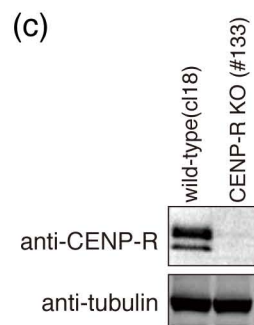

C

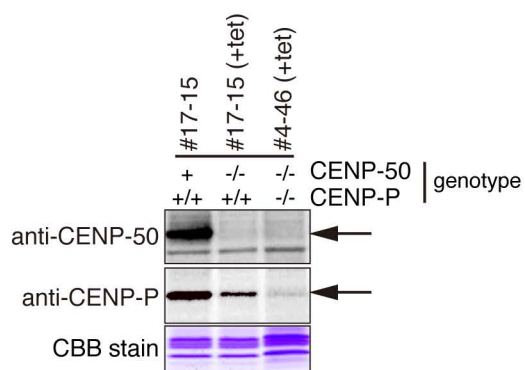

mutated sites of CENP-50 mutants

1 MSSKKRTRKRN RAGDEYKEHKGRSHPRRKFLPPEEPDVSRI  
41 SKVAGVNQLEELCDSFDQPLHSTAVDACGEEHSENESSGY  
81 VPAPQRTNAERSEKMLLE**T**PEGDVHEFSQSG**S**VREPLMEN  
121 LNAPN**TR**SEVKKKRP**SKKSSSDSSVNSPS**SVQLWCPNKL  
161 KR**SS**RDI**T**ELDVVLAEFEKIAANYRQSIESKACRKA<sup>V</sup>SAF  
201 CSAFEDQVTDLITEVQELKNTKKKNAKVVADIKKKRQRLM  
241 QVREKLSRTEPQLIKLQKEYAEVEERRSSLRQVVQFLTDL  
281 KELQODYLDYREENPRKKVYVGASSLPALLVESRRILQAE  
321 RHFQINIRKLEYALEVQRGKLAKEH
